# Supplementary material
Source: PubMed Central journal article supplement (PMC6791731)
Supplement: NIHMS1024272-supplement-Supp_info.pdf [file NIHMS1024272-supplement-Supp_info.pdf]

**Supporting Information for:**

**TRPC channels are not required for graded persistent activity  
in entorhinal cortex neurons**

**Alexei V. Egorov<sup>1</sup>, Dagmar Schumacher<sup>2</sup>, Rebekka Medert<sup>2</sup>, Lutz Birnbaumer<sup>3</sup>,  
Marc Freichel<sup>2</sup> and Andreas Draguhn<sup>1</sup>**

*<sup>1</sup>Institute of Physiology and Pathophysiology, Heidelberg University,  
69120 Heidelberg, Germany*

*<sup>2</sup>Institute of Pharmacology, Heidelberg University, 69120 Heidelberg, Germany*

*<sup>3</sup>Neurobiology Laboratory, National Institute of Environmental Health Sciences, Durham,  
North Carolina 27709, USA and School of Medical Sciences, Catholic University of Argentina,  
Institute of Biomedical Research (BIOMED UCA-CONICET), Buenos Aires, Argentina*

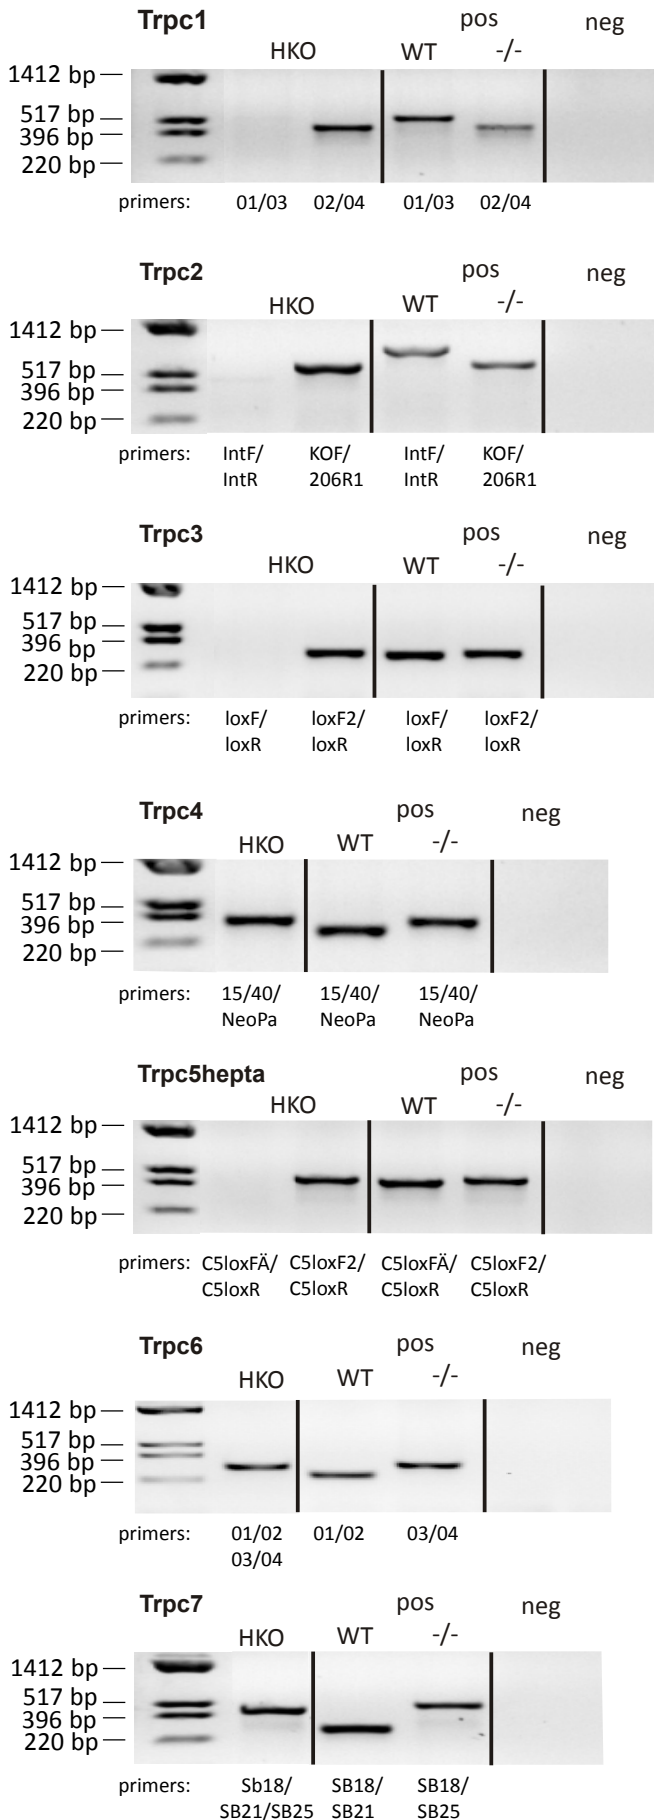

**Figure S1. PCR-based genotyping of *Trpc1/2/3/4/5/6/7*<sup>-/-</sup> animals**

Ethidium bromide stained DNA fragments obtained by PCR from *Trpc1/2/3/4/5/6/7*<sup>-/-</sup> Hepta KO (HKO) mice following gel electrophoresis of the amplification products of genomic DNA fragments that are diagnostic for each of the seven TRPC wild type and TRPC null alleles, respectively, are shown. Allele specific primer combinations are indicated and their sequence is listed in Table S1. The sizes of marker DNA fragments are indicated. pos, positive control sample; neg, negative control sample without template DNA.

**Table S1. Genotyping of TRPC-deficient mice**

Genotyping of TRPC wildtype and Null alleles were performed by PCR using the amplification protocol and primers as indicated below.

Cyling programm:

|             |                                |                  |
|-------------|--------------------------------|------------------|
| 94°C        | 1:30                           |                  |
| 94°C        | 0:30                           | <b>10 cycles</b> |
| <b>65°C</b> | 0:30 -0,5°C decrease per cycle |                  |
| 72°C        | 0:30                           |                  |
| 94°C        | 0:30                           | <b>26 cycles</b> |
| <b>60°C</b> | 0:30                           |                  |
| 72°C        | 0:30                           |                  |
| 72°C        | 5:00                           |                  |
| 4°C         | ∞                              |                  |

|                    |            |                                |
|--------------------|------------|--------------------------------|
| <b>TRPC1:</b>      | Primer 01: | GAGACTGTTGTCACAAGATGC          |
|                    | Primer 02: | TCAGTTAATGTCCCATTCCGGC         |
|                    | Primer 03: | ACTTTGAGGGCAAAGGTTGCC          |
|                    | Primer 04: | AGAGGCCACTTGTGTAGCGC           |
| <b>TRPC2:</b>      | IntF:      | ATGACGGGTTTATGGCTCAG           |
|                    | IntR:      | GATCCCCTGGAATTGGAGTT           |
|                    | KOF:       | CTGTAGCCATCTTCAGACACACC        |
|                    | 206R1:     | ACGAGACTAGTGAGACGTGCTAC        |
| <b>TRPC3:</b>      | loxF:      | GCTATGATTAATAGCTCATACCAAGAGATC |
|                    | loxF2:     | GAATCCACCTGCTTACAACCATGTG      |
|                    | loxR:      | GGTGGAGGTAACACACAGCTAAGCC      |
| <b>TRPC4:</b>      | 15:        | ACAGTGCTCTGAACCCACGG           |
|                    | 40:        | CTCGCACCGGATGCCTTTGC           |
|                    | NeoPa:     | GCCTGCTCTTTACTGAAGGCTCT        |
| <b>TRPC5hepta:</b> | C5loxFÄ:   | GGCGCAGAAAGAGTTTATGGGGA        |
|                    | C5loxR:    | GGATGTTGGCTCTGTGAAACAATGACTC   |
|                    | C5loxF2:   | AGCTAACAGTATCCCTAAGTGATCC      |
| <b>TRPC6:</b>      | Primer 01: | ACGAGACTAGTGAGACGTGCTACTTCC    |
|                    | Primer 02: | GGGTTTAATGTCTGTATCACTAAAGCCTCC |
|                    | Primer 03: | CAGATCATCTCTGAAGGTCTTTATGC     |
|                    | Primer 04: | TGTGAATGCTTCATTCTGTTTTGCGCC    |
| <b>TRPC7:</b>      | SB18:      | CGTAGCAATAGAACTTAACTTAG        |
|                    | SB21:      | CCACTAAACCCAAGCACATGG          |
|                    | SB25:      | GACACACCTGCCAGGCAC             |

**Table S2. Intrinsic properties of mEC LV neurons of TRPC1/4/5 knockout mice, and hepta-TRPC knockout versus WT control mice**

| mEC LV                                          | TRPC1/4/5 KO<br>(C57Bl6/N<br>background) |          | hepta-TRPC KO |          | vs.      | WT control   |          |
|-------------------------------------------------|------------------------------------------|----------|---------------|----------|----------|--------------|----------|
|                                                 |                                          | <i>n</i> |               | <i>n</i> | <i>p</i> |              | <i>n</i> |
| Resting mp (mV)                                 | -65.3 ± 1.2                              | 8        | -73.4 ± 5.4   | 11       | 0.002*   | -64.9 ± 2.2  | 6        |
| Input resistance (MΩ)                           | 66 ± 27                                  | 8        | 83 (59; 89)   | 11       | 0.024*   | 103 ± 24     | 6        |
| AP threshold (mV)                               | -48.0 ± 2.4                              | 8        | -47.7 ± 2.4   | 12       | 0.757    | -48.1 ± 1.1  | 6        |
| AP amplitude (mV)                               | 64.9 ± 3.7                               | 8        | 62.9 ± 6.7    | 12       | 0.803    | 62.1 ± 5.4   | 6        |
| AP half-width (ms)                              | 0.67 ± 0.11                              | 8        | 0.87 ± 0.1    | 12       | 0.118    | 0.80 ± 0.1   | 6        |
| AP rise slope (mV/ms)                           | 147.5 (142; 152)                         | 8        | 141.1 ± 17.9  | 12       | 0.916    | 140.2 ± 15.3 | 6        |
| AP fall slope (mV/ms)                           | -90.3 ± 17.5                             | 8        | -62.0 ± 11.2  | 12       | 0.190    | -69.3 ± 9.6  | 6        |
| <b>AHP following single AP</b>                  |                                          |          |               |          |          |              |          |
| fAHP amplitude (mV)                             | 10.6 ± 3.4                               | 7        | 9.4 ± 2.2     | 8        | 0.301    | 8.4 ± 1.1    | 6        |
| fAHP latency (ms)                               | 1.9 ± 0.3                                | 7        | 2.4 ± 0.4     | 8        | 0.588    | 2.3 ± 0.2    | 6        |
| mAHP amplitude (mV)                             | 14.5 (13.7; 15.2)                        | 8        | 16.0 ± 2.5    | 12       | 0.218    | 14.6 ± 1.6   | 6        |
| mAHP latency (ms)                               | 14.6 ± 7.6                               | 8        | 24.1 ± 9.7    | 12       | 0.754    | 25.5 ± 5.8   | 6        |
| <b>mAHP following train of APs</b>              |                                          |          |               |          |          |              |          |
| <b>mAHP</b> amplitude (mV)<br>Δ to AP threshold | 17.9 ± 4.8                               | 8        | 19.7 ± 2.5    | 7        | 0.004*   | 15.5 ± 1.6   | 6        |
| <b>mAHP</b> amplitude (mV)<br>Δ to recording mp | 4.6 ± 2.6                                | 8        | 7.0 ± 2.8     | 7        | 0.019*   | 3.7 ± 1.1    | 6        |
| Recording mp (mV)                               | -59.8 ± 3.1                              | 8        | -60.6 ± 2.5   | 7        | 0.628    | -59.9 ± 1.9  | 6        |

All values were obtained in the presence of CCh and during blockade of AMPA-, NMDA- and GABA(A)-mediated neurotransmission. Averaged data are given as mean ± SD or as median (P<sub>25</sub>; P<sub>75</sub>). P values for hepta-TRPC KO vs. WT control mice (Unpaired two-tailed t-test; Mann-Whitney U-test for input resistance, \* *p* < 0.05). AP: action potential, fAHP: fast after-hyperpolarization, mAHP: medium afterhyperpolarization, mp: membrane potential.
